# Supplementary material for: Multi-component colloidal gels: interplay between structure and mechanical properties
Source: Royal Society of Chemistry journal article supplement (doi:10.1039/c9sm02410g), 2020-01-01
Supplement: c9sm02410g2.pdf [file c9sm02410g2.pdf]

## Caption for the supporting videos

Claudia Ferreiro-Córdova et al.

December 7, 2019

### **Video 1: "Video\_1\_monogel.mp4"**

Non-affine vectors for monogel during continuous strain deformation from  $\gamma = 0.0$  to  $\gamma = 0.5$  with a shear rate of  $\dot{\gamma} = 10^{-5}\tau_0^{-1}$ . Particles are not rendered. The colour of the vectors indicates the magnitude of the displacement in  $d$  units.

### **Video 2: "Video\_2\_trigel.mp4"**

Non-affine vectors for trigel during continuous strain deformation from  $\gamma = 0.0$  to  $\gamma = 0.5$  with a shear rate of  $\dot{\gamma} = 10^{-5}\tau_0^{-1}$ . Particles are not rendered. The colour of the vectors indicates the magnitude of the displacement in  $d$  units.
